# Supplementary material for: SNP rs2057482 in HIF1A gene predicts clinical outcome of aggressive hepatocellular carcinoma patients after surgery
Source: PubMed Central journal article supplement (PMC4481773; doi:10.1038/srep11846), 2015-06-26

**SNP rs2057482 in *HIF1A* gene predicts clinical outcome of aggressive hepatocellular carcinoma patients after surgery**

Xu Guo<sup>1#</sup>, Deyang Li<sup>1#</sup>, Yibing Chen<sup>2</sup>, Jiaze An<sup>3</sup>, Kan Wang<sup>4</sup>, Zhuding Xu<sup>5</sup>, Zhinan Chen<sup>1\*</sup>,  
Jinliang Xing<sup>1,2\*</sup>

**Figure legend**

Figure S1. Survival curves of HCC patients by SNP rs2057482. (A) Overall survival. (B) Recurrence-free survival.

Figure S1. Survival curve of rs2057482 in HCC.

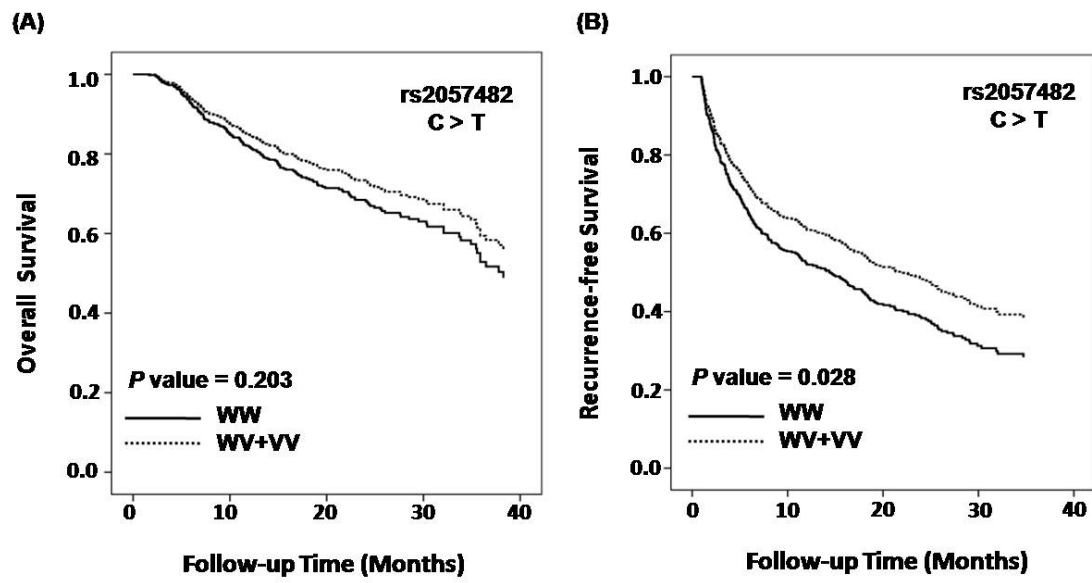

Supplement: srep11846-s1.pdf [file srep11846-s1.pdf]
